# Supplementary material for: Hollow structured and flower-like C@MnCo2O4composite for high electrochemical performance in a supercapacitor
Source: Royal Society of Chemistry journal article supplement (doi:10.1039/c4ce01323a), 2014-01-01
Supplement: c4ce01323a1.pdf [file c4ce01323a1.pdf]

## Electronic Supplementary Information

### Hollow structured and flower-like C@MnCo<sub>2</sub>O<sub>4</sub> composite for high electrochemical performance in supercapacitor

Lei Li,<sup>a</sup> Fei He,<sup>a</sup> Shili Gai,<sup>a</sup> Shenghuan Zhang,<sup>a</sup> Peng Gao,<sup>\*a</sup> Milin Zhang,<sup>a</sup> Yujin  
Chen,<sup>\*b</sup> and Piaoping Yang<sup>\*a</sup>

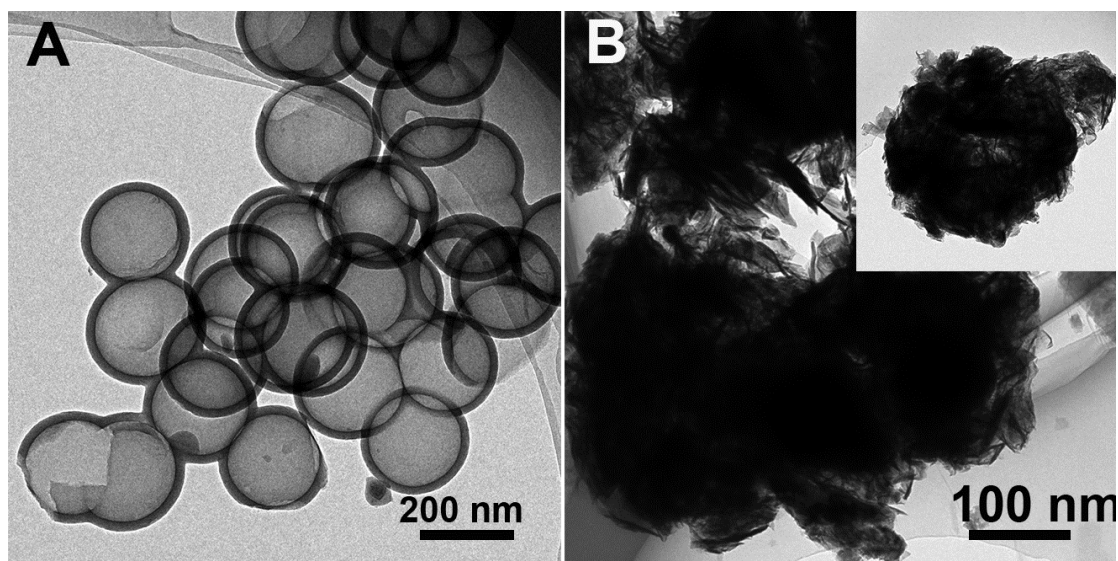

**Fig. S1** TEM images of pure carbon shell and pure MnCo<sub>2</sub>O<sub>4</sub> nanosheets.

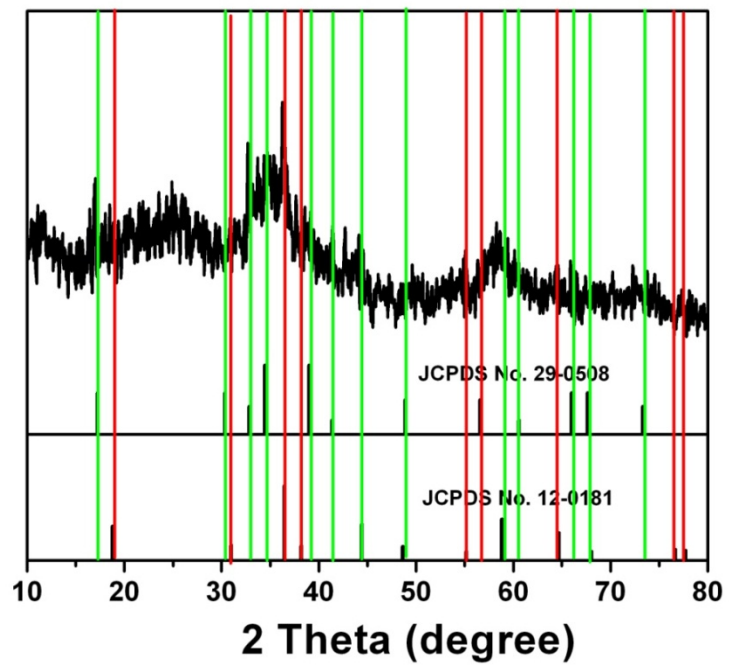

**Fig. S2** XRD pattern of C@metal silicate.

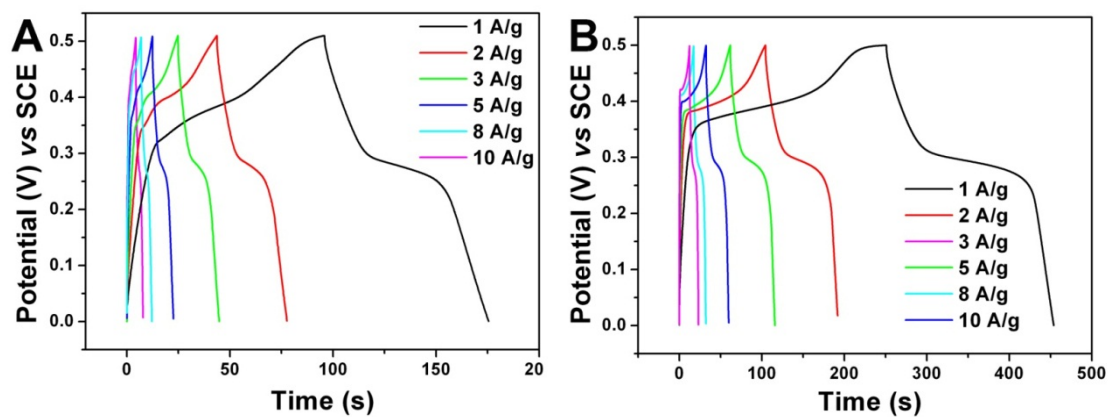

**Fig. S3** Charge-discharge plots of pure carbon shell and pure  $\text{MnCo}_2\text{O}_4$ .
